# Supplementary figures and images for: Selective constraint and adaptive potential of West Nile virus within and among naturally infected avian hosts and mosquito vectors
Source: PubMed Central journal article supplement — Virus Evol. 2018 Jun 12;4(1):vey013. doi: 10.1093/ve/vey013 (PMC6007309; doi:10.1093/ve/vey013), 2018-06-12

**A**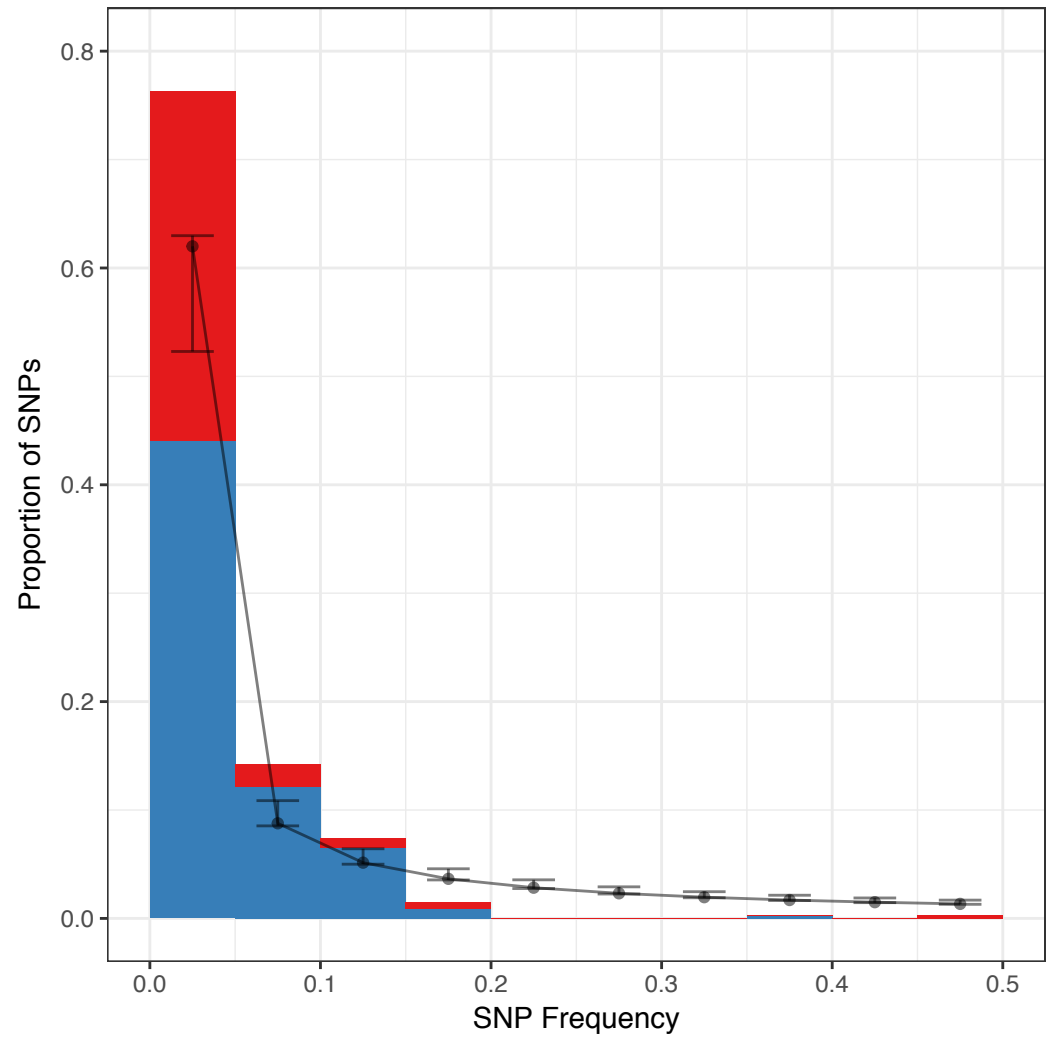**B**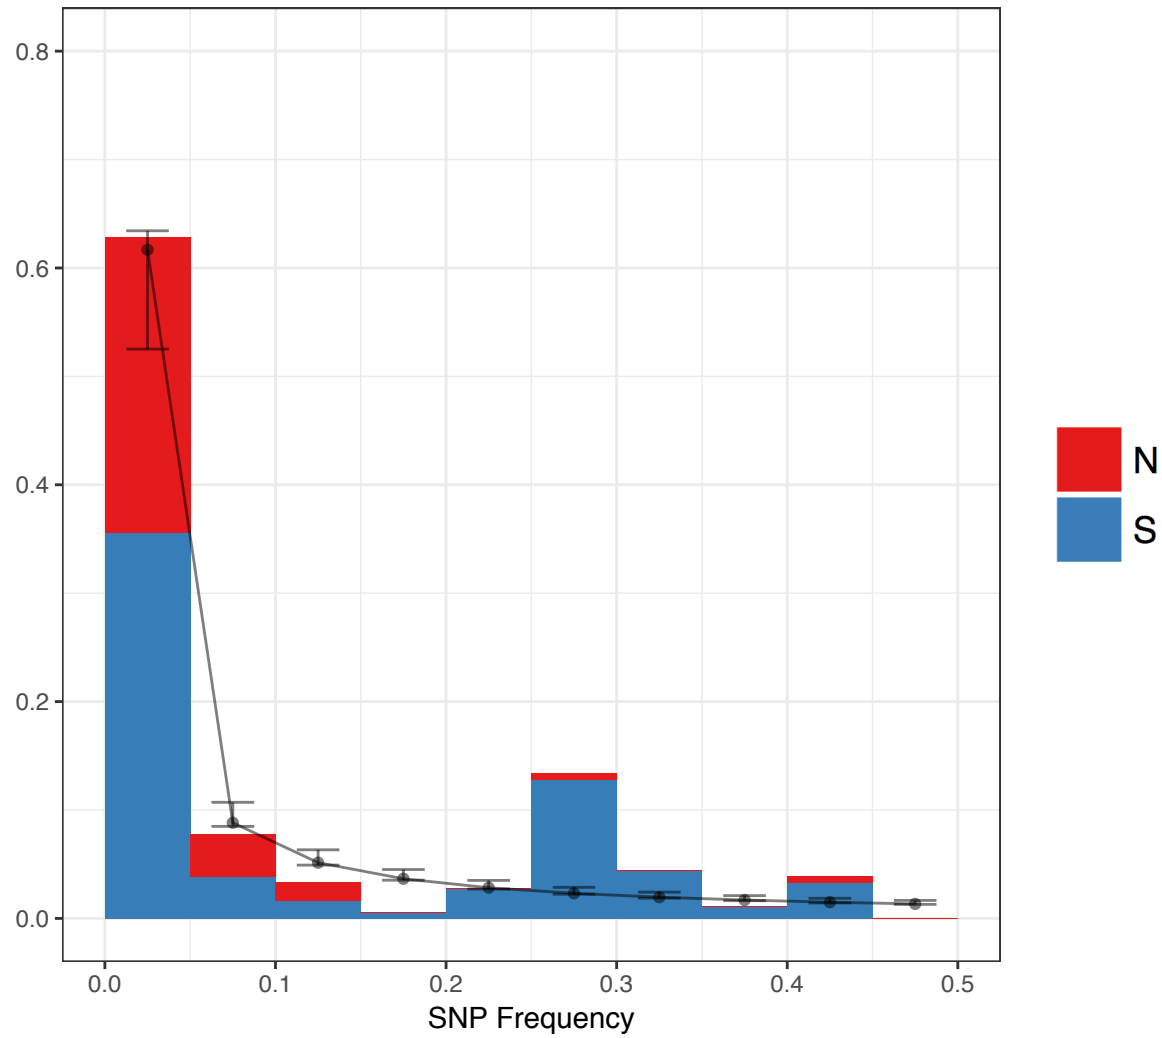

Supplement: vey013_supp_sf_1.pdf [file vey013_supp_sf_1.pdf]

## Variable Site 2

Reference

Variant

Reference

7,118

1,003

Variable Site 1

Variant

1,077

2,771

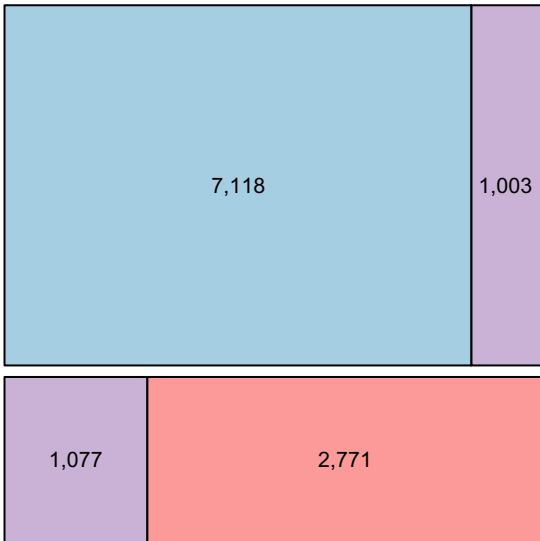

Supplement: vey013_supp_sf_2.pdf [file vey013_supp_sf_2.pdf]

100.0

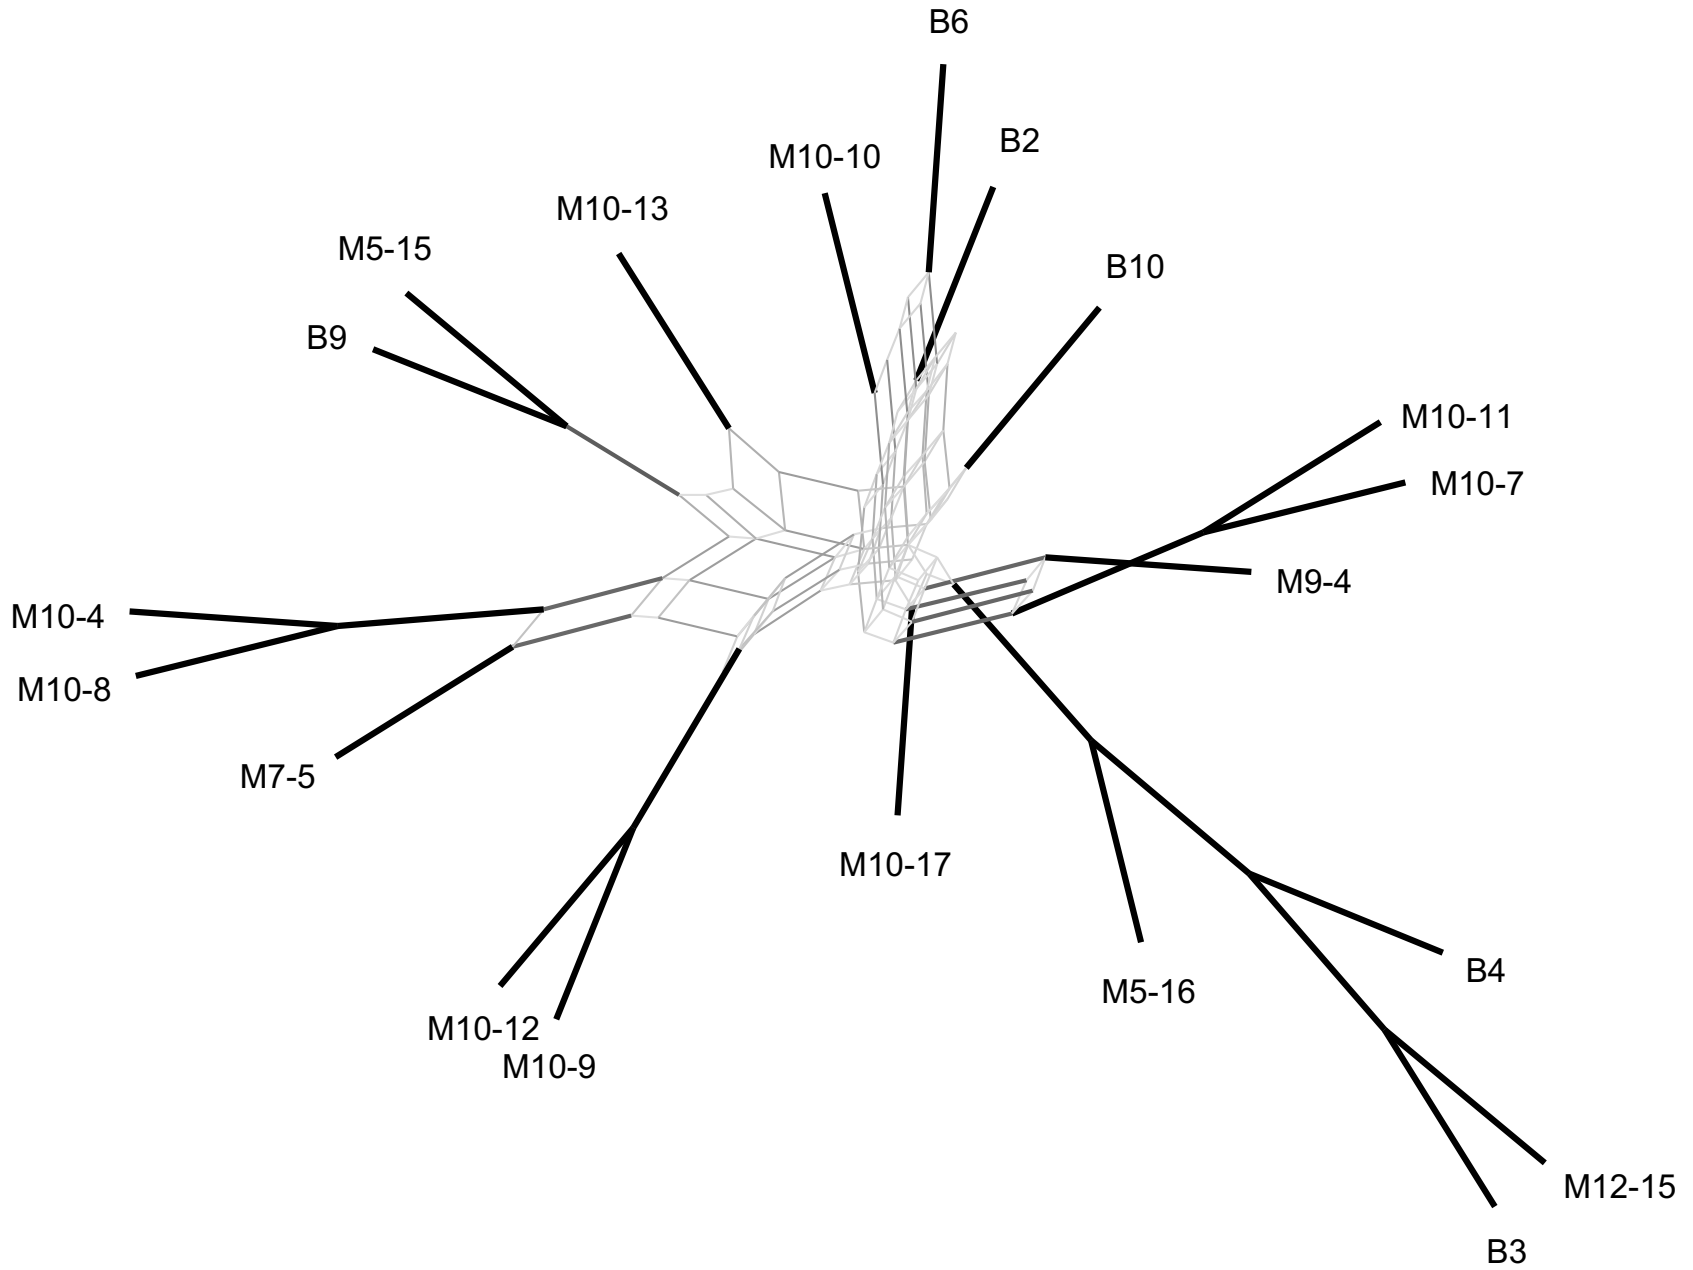

Supplement: vey013_supp_sf_3.pdf [file vey013_supp_sf_3.pdf]
